# **Comparative genomics of Chinese and international isolates of *Escherichia albertii*: population structure and evolution of virulence and antimicrobial resistance**

Lijuan Luo<sup>1†</sup>, Hong Wang<sup>2†</sup>, Michael Payne<sup>1</sup>, Chelsea Liang<sup>1</sup>, Li Bai<sup>3</sup>, Han Zheng<sup>4</sup>, Zhengdong Zhang<sup>2</sup>, Ling Zhang<sup>2</sup>, Xiaomei Zhang<sup>1</sup>, Guodong yan<sup>2</sup>, Nianli Zou<sup>2</sup>, Xi Chen<sup>2</sup>, Ziting Wan<sup>2</sup>, Yanwen Xiong<sup>4</sup>, Ruiting Lan<sup>1\*</sup>, Qun Li<sup>2\*</sup>

<sup>1</sup>School of Biotechnology and Biomolecular Sciences, University of New South Wales, Sydney, New South Wales, Australia.

<sup>2</sup>Zigong Center for Disease Control and Prevention, Zigong, China.

<sup>3</sup>Division I of Risk Assessment, National Health Commission Key Laboratory of Food Safety Risk Assessment, Food Safety Research Unit (2019RU014) of Chinese Academy of Medical Science, China National Center for Food Safety Risk Assessment, Beijing, China

<sup>4</sup>State Key Laboratory of Infectious Disease Prevention and Control, Collaborative Innovation Center for Diagnosis and Treatment of Infectious Diseases, National Institute for Communicable Disease Control and Prevention, Chinese Center for Disease Control and Prevention, Beijing, China.

† These authors contributed equally.

\* Co-corresponding authors

Ruiting Lan: [r.lan@unsw.edu.au](mailto:r.lan@unsw.edu.au)

Qun Li: [lqzgcdc@163.com](mailto:lqzgcdc@163.com)

**Key words:** *Escherichia albertii*, population structure, virulence, MDR, plasmid, prophage

**Repositories:** All newly sequenced data in this work were deposited in National Center for Biotechnology Information (NCBI) under the BioProject of PRJNA693666, the data of which would be released once the manuscript is published.

1 **Comparative genomics of Chinese and international isolates of**  
2 ***Escherichia albertii*: population structure and evolution of virulence**  
3 **and antimicrobial resistance**

4 **Abstract**

5 *Escherichia albertii* is a newly recognized species in the genus *Escherichia* that  
6 causes diarrhea. The population structure, genetic diversity and genomic features has  
7 not been fully examined. Here, 169 *E. albertii* isolates from different sources and  
8 regions in China were sequenced and combined with 312 publicly available genomes  
9 for phylogenetic and genomic analyses. The *E. albertii* population was divided into 2  
10 clades and 8 lineages, with lineage 3 (L3), L5 and L8 more common in China.  
11 Clinical isolates were observed in all clades/lineages. Virulence genes were found to  
12 be distributed differently among lineages: subtypes of the intimin encoding gene *eae*  
13 and the cytolethal distending toxin (Cdt) gene *cdtB* were lineage associated, the  
14 second type three secretion system (ETT2) island was truncated in L3 and L6. Seven  
15 new *eae* subtypes and 1 new *cdtB* subtype (*cdtB*-VI) were found. Alarmingly, 85.9%  
16 of the Chinese *E. albertii* isolates were predicted to be multidrug resistant (MDR)  
17 with 35.9% harboured genes capable of conferring resistance to 10 to 14 different  
18 drug classes. By *in silico* multi-locus sequence typing, majority of the MDR isolates  
19 belonged to 4 STs (ST4638, ST4479, ST4633 and ST4488). Thirty-four intact  
20 plasmids carrying MDR and virulence genes, and 130 intact prophages were  
21 identified from 17 complete *E. albertii* genomes. Ten plasmid replicon types were  
22 found to be significantly associated with MDR. The 130 intact prophages were  
23 clustered into 5 groups, with group 5 prophages harbouring more virulence genes. Our

1 findings provided fundamental insights into the population structure, virulence  
2 variation and MDR of *E. albertii*.

### 3 **Impact statement**

4 *E. albertii* is newly recognized foodborne pathogen causing diarrhea. Elucidation of  
5 its genomic features is important for surveillance and control of *E. albertii* infections.  
6 In this work, 169 *E. albertii* genomes from difference sources and regions in China  
7 were collected and sequenced, which contributed to the currently limited genomic  
8 data pool of *E. albertii*. In combination with 312 publicly available genomes from 14  
9 additional countries, the population structure of *E. albertii* was defined. The presence  
10 and subtypes of virulence genes in different lineages were significantly different,  
11 indicating potential pathogenicity variation. Additionally, the presence of multidrug  
12 resistance (MDR) genes was alarmingly high in the Chinese dominated lineages.  
13 MDR associated STs and plasmid subtypes were identified, which could be used as  
14 sentinels for MDR surveillance. Moreover, the subtypes of plasmids and prophages  
15 were distributed differently across lineages, and were found to contribute to the  
16 acquisition of virulence and MDR genes of *E. albertii*. Altogether, this work reveals  
17 the diversity of *E. albertii* and characterized its genomic features in unprecedented  
18 detail.

### 19 **Abbreviation**

20 EHEC, enterohemorrhagic *Escherichia coli*; T3SS, type III secretion system; LEE,  
21 enterocyte effacement; Cdt, cytolethal distending toxin; ETT2, type III secretion  
22 system 2; Stx, Shiga toxin; AR, antimicrobial resistance; MDR, multidrug resistance;  
23 NCBI, National Center for Biotechnology Information; MLST, multi-locus sequence

1 typing; ST, sequence type; CC, clonal complexes; HPI, high pathogenicity island;  
2 MVP, Microbe Versus Phage.

### 3 **Data Summary**

4 All newly sequenced data in this work were deposited in National Center for  
5 Biotechnology Information (NCBI) under the BioProject of PRJNA693666, including  
6 6 complete genomes and raw reads of 164 *E. albertii* isolates.

### 7 **Introduction**

8 *Escherichia albertii* is a recently defined species and a recognised foodborne human  
9 pathogen [1-3]. *E. albertii* mainly causes diarrhea [3, 4], while bacteraemic human  
10 infections were also reported [5]. *E. albertii* has historically been misidentified as  
11 various pathogens such as enterohemorrhagic *Escherichia coli* (EHEC),  
12 enteropathogenic *E. coli* (EPEC), *Shigella boydii* serotype 13, and *Hafnia alvei* [1, 6].  
13 In 2003, it was confirmed to be a novel species of the genus *Escherichia* and named  
14 as *E. albertii* [2, 6]. Through retrospectively studies, *E. albertii* was found to be  
15 responsible for a human diarrhea outbreak in Japan in 2011 [7]. *E. albertii* can also  
16 cause infections in other animals. An outbreak of *E. albertii* infection in common  
17 redpoll finches in Alaska led to deaths of hundreds of birds in 2004 [8]. Furthermore,  
18 *E. albertii* has also been isolated from a variety of sources including food products [9].

19 The pathogenicity of *E. albertii* was mainly attributed to a type III secretion system  
20 (T3SS) encoded by the locus of enterocyte effacement (LEE) and the cytolethal  
21 distending toxin (Cdt) encoded by the *cdtABC* operon, both of which were commonly  
22 found in *E. albertii* [1, 9, 10]. There were also multiple non-LEE effector genes [11].  
23 Based on the presence of the intimin *eae* gene, the LEE locus was found to be widely  
24 present in *E. albertii* [1, 9]. The non-LEE effector genes, which were mainly acquired

1 through prophages in *E. coli* [11], were observed in three *E. albertii* complete genomes  
2 [10]. Another *E. coli* type III secretion system 2 (ETT2), which has major effects on  
3 the surface proteins associated with motility and serum survival (as a prerequisite for  
4 bloodstream infections) of *E. coli*, has also been found in *E. albertii* [12]. ETT2 were  
5 predicted to be common in *E. albertii* based on the representative *eivG* gene [1, 10].  
6 Shiga toxin (Stx) gene *stx2f* and *stx2a* are sporadically observed in *E. albertii* [1].  
7 However, the detailed distribution of these genes in *E. albertii* remained unclear, and  
8 the other virulence factors reported in *E. coli* have not been systematically  
9 investigated in *E. albertii*.

10 Antimicrobial resistance (AR), especially multi drug resistance (MDR) which is  
11 defined as resistance to 3 or more drug classes, is an increasing global challenge [13].  
12 Phenotypic AR and MDR of *E. albertii* strains were observed in Brazil and China,  
13 respectively [14, 15]. Poultry source *E. albertii* isolates in China were phenotypically  
14 resistant to up to 11 drug classes, some of which were commonly used in clinical  
15 treatment such as cephalosporins, aminoglycosides, fluoroquinolones, and beta-lactam  
16 antibiotics [14]. However, the overall presence of AR genes in *E. albertii* isolates  
17 from different geographic regions and sources remains unclear.

18 It is well known that transmissible elements, especially plasmids and phages, are  
19 associated with the acquisition of virulence and AR genes [16]. They are key  
20 transmissible elements for the acquisition of *stx* genes, T3SS effector genes, and other  
21 virulence genes in *E. coli* [16]. Multiple intact plasmids of *E. albertii* carrying  
22 virulence and MDR genes were reported [1, 14, 17]. However, plasmids in draft  
23 genomes of *E. albertii* and their association with the acquisition of AR and virulence  
24 genes remain to be characterized [1, 10]. Prophages have been found in *E. albertii*

1 with 4-7 prophages per genome from 3 complete genomes analysed [1]. However,  
2 their carriage of virulence and AR genes has not been examined.

3 Two clades of *E. albertii* have previously been defined based on whole genome  
4 sequencing analysis [1, 18], with no isolates from China. In this work, *E. albertii* from  
5 different sources and regions of China were isolated and sequenced, including 163  
6 draft and 6 complete genomes. Publicly available complete genomes and draft  
7 genomes of *E. albertii* were analysed together to elucidate the population structure,  
8 virulence and resistance of *E. albertii* and the relationships of Chinese and  
9 international isolates.

## 10 **Methods:**

### 11 **Genomic sequences**

12 A total of 169 *E. albertii* isolates from different sources and regions in China were  
13 collected and sequenced. The *E. albertii* type strain LMG20976 was also sequenced in  
14 this study. All of the isolates were sequenced using Illumina sequencing [19], except  
15 for 6 isolates that were additionally sequenced using Pacbio [20] to obtain complete  
16 genomes.

17 Raw reads and assemblies of publicly available *E. albertii* isolates were  
18 downloaded. To identify *E. albertii* isolates that were potentially misidentified as *E.*  
19 *coli*, one reported specific gene (EAKF1\_ch4033) of *E. albertii* [21], was searched  
20 against a total of 29,988 *E. coli* (including *Shigella*) genome assemblies using  
21 BLASTN, with the thresholds of coverage 50% and identity of 70%.

22 In summary, there were a total of 482 genomic sequences of *E. albertii* included in  
23 this study (**Table S1**). For draft genome sequences, 164 were from this study and 296  
24 were from public databases (255 raw reads from European Nucleotide Archive and 41

1 assemblies from NCBI). For complete genomes, there were 6 from this study, and 16  
2 genomes from NCBI (10 of which were sequenced by PacBio). Raw reads of Illumina  
3 sequencing were assembled using Skesa v2.4.0 [22].

#### 4 **Phylogenetic analysis and in silico multi-locus sequence typing (MLST) of *E.*** 5 ***albertii***

6 In an initial analysis, 38 representative isolates were selected to represent *E. albertii*  
7 diversity to obtain the over picture and to identify the root of the *E. albertii*  
8 phylogeny. Using *E. coli* (Accession No. NZ\_CP014583.1) as reference, SNPs were  
9 called by snippy v4.4.0 [23], and recombinant SNPs were detected and removed by  
10 Gubbins v2.0.0 [24]. A maximum parsimony tree based on SNPs of the 38 isolates  
11 using *E. coli* as outgroup was constructed by Mega X with 1000 bootstraps [25].

12 To elucidate the phylogenetic relationship of the 482 *E. albertii* isolates, a  
13 phylogenetic tree was constructed using SaRTree v1.2.2 with ASM287245v1 as  
14 reference [26]. The recombination sites of the SNPs were removed using Recdetect  
15 v6.0 [26]. The SNP alignment of the genomes were analysed with Fastbaps v1.0.4 to  
16 identify lineages of *E. albertii* [27]. The lineages defined were mapped onto the  
17 phylogenetic tree using ITOL v4 [28].

18 The *in silico* MLST based on the 7 housekeeping genes of *E. coli*, were performed  
19 on *E. albertii* with sequence types (STs) assigned [23, 29]. Clonal complexes (CCs) of  
20 the STs were called based on one allele difference using the eBURST algorithm [39].

#### 21 **Virulence and antibiotic resistance analysis of *E. albertii***

22 Predicted virulence and antimicrobial resistant genes from the *E. albertii* genomes  
23 were identified by Abricate v0.8.13 [23]: Virulence genes were screened against the  
24 *E. coli* virulence factors database (Ecoli\_VF) and the virulence factor database

1 (VFDB) with identity of  $\geq 70\%$  and coverage of  $\geq 50\%$  [30]; Antibiotic resistant  
2 genes were screened through the NCBI AMRFinder database with identity of  $\geq 90\%$   
3 and coverage of  $\geq 90\%$  [13];

4 To predict the subtypes of the *eae* and *cdtB* genes harboured by each *E. albertii*  
5 isolate, representative sequences for each type of *eae* and *cdtB* were used to search the  
6 collection of *E. albertii* genomes using BLASTN with identity of  $\geq 97\%$  and  
7 coverage of  $\geq 50\%$  [31]. The new *eae* and *cdtB* subtypes were defined based on the  
8 tree structure and BLASTN results. A new subtype was defined, if it was  
9 phylogenetically distant from the known subtypes and was present in  $\geq 5$  isolates  
10 (with identity  $\geq 97\%$ ). The detailed methods for single gene phylogenetic tree  
11 construction for *eae* and *cdtB* were described in **supplementary methods**.

## 12 **Plasmid and prophage analysis based on complete genomes of *E. albertii***

13 For intact plasmids and prophages of *E. albertii*, 16 complete genomes by PacBio and  
14 one reference genome GCA\_001549955.1 (sequenced by 454 GS-FLX) were selected  
15 for the prophage and plasmid analysis.

16 To identify the plasmids in the draft genomes, we used both PlasmidFinder and  
17 MOB-suite [23, 32]. Plasmid replicon genes were screened against the PlasmidFinder  
18 database with identity of  $\geq 50\%$  and coverage of  $\geq 50\%$  using Abricate v0.8.13  
19 [23]. MOB suite was able to identify the potential plasmid sequences in draft  
20 genomes. MOB types were assigned if the predicted plasmids were known. To  
21 evaluate if the presence of the invasive plasmid pINV of *Shigella* present in *E. albertii*,  
22 the pINV specific gene *ipaH* and 39 plasmid-borne virulence genes were screened in  
23 the raw reads of *E. albertii* using ShigEiFinder [33]. AR genes and virulence genes



1 present on the intact plasmids and MOB suite predicted plasmids were screened using  
2 the aforementioned criteria.

3 The complete genomes were submitted to Phaster for prophage prediction [34]. In  
4 order to define the groups of the intact prophages, the genomic sequences of  
5 prophages were annotated with Prokka v1.12 [35]. The gff files of the intact  
6 prophages were clustered by Roary v3.11.2 with identity of  $\geq 70\%$ , and a binary  
7 gene presence and absence tree was generated [36]. The concatenated prophage  
8 sequences in the order of binary clustering were visualized in similarity plots by  
9 Gepard v1.40 [37]. Genes whose presence was significantly associated with prophage  
10 groups ( $P \leq 0.001$ ) were identified using Scoary [38]. The top 3 to 5 genes that are  
11 of 100% specificity and sensitivity for each prophage group were identified as  
12 potential prophage specific genes. These prophage specific gene candidates were  
13 searched against the 482 genomes with identity  $\geq 70\%$  and coverage  $\geq 50\%$  using  
14 BLASTN. The distribution of the prophage specific genes were visualized in  
15 Phandango [39]. AR genes, plasmid replicon genes and virulence genes present on the  
16 intact prophages were screened using the aforementioned criteria.

17 To compare the prophages of *E. albertii* with public phage clusters from the  
18 Microbe Versus Phage (MVP) database, the representative phage sequences of  
19 different phage clusters were downloaded [40]. Each prophage sequence of *E. albertii*  
20 was searched against the MVP reference phage cluster sequences with identity of 80%  
21 and coverage of 50% using BLASTN [40].

## 22 **Results:**

### 23 **A dataset representing *E. albertii* distribution in different source types and** 24 **geographic regions**

1 A total of 169 *eae* gene positive *E. albertii* isolates from different regions of China  
2 were collected from 2014 to 2019 and sequenced in this study. The *E. albertii* isolates  
3 were from five provinces in China, the majority of which were from Sichuan province  
4 in Southern China and Shandong province in Northern China (**Table S1**). The  
5 Chinese *E. albertii* isolates belonged to 7 different source types, with 90.5% from  
6 poultry intestine (with 110 isolates from chicken intestines and 43 from duck  
7 intestines). There were 6 human source isolates from China (**Table S2**). Three isolates  
8 were from patients with diarrhea, including one patient with bloody diarrhea. Three *E.*  
9 *albertii* isolates were from poultry butchers and retailers who were asymptomatic.  
10 Two *E. albertii* isolates were from the faecal samples of bats in Yunnan, China.  
11 Notably, as only *eae* positive samples were cultured for *E. albertii* in this study, any  
12 *eae* negative *E. albertii* isolates would have not been isolated.

13 To compare the genomic characteristics of *E. albertii* globally, a total of 312  
14 publicly available *E. albertii* genome sequences were included in this study. Based on  
15 the metadata available, these isolates were from 6 continents and 12 different source  
16 types including humans, birds, bovine, swine, cats, water mammals, camelid, plants,  
17 soil and water. Humans (76 isolates) and birds (30 isolates) were the dominant  
18 sources (**Table S3**).

19 All 482 genomes were screened using the *E. albertii* specific gene marker  
20 (EAKF1\_ch4033) [21] with 4 isolates being negative. Phylogenetic analysis  
21 confirmed the 4 EAKF1\_ch4033-negative isolates belonged to the *E. albertii* clade 1  
22 as described below.

23 ***E. albertii* lineages and their distribution in different geographic regions and**  
24 **source types**

1 Previous studies showed that *E. albertii* is divided into 2 clades [1, 18]. To better  
2 define the phylogenetic lineages, we used Fastbaps to analyse the population divisions  
3 of the 482 *E. albertii* isolates using non-recombinant SNPs (with recombinant SNPs  
4 removed) as input. Eight lineages of *E. albertii* were defined (353 isolates) while 129  
5 did not belong to any lineage (**Figure 1**) [27]. Lineage 1 (L1) corresponds to  
6 previously defined clade 1, and L2 to L7 belonged to the previously defined clade 2  
7 [1, 18]. It is noteworthy that the *E. albertii* isolates which were previously identified  
8 as *S. boydii* serotype 13 belonged to L3. Each lineage includes isolates from multiple  
9 continents. L5 and L8 were more common in Asia, while L1 (or clade 1), L3 and L6  
10 were more common in Europe and North America (**Figure S1**).

11 The 85 human clinical isolates were distributed among the 8 lineages indicating all  
12 of these lineages were potentially pathogenic to humans (**Figure 1**). For Chinese *E.*  
13 *albertii* isolates, the 6 human clinical isolates belonged to L4 (2), L7 (1), L8 (1), with  
14 two not falling into any lineages (**Table S2**). The two bat source isolates did not  
15 belong to any of the lineages but were most related to L3. There were 158 poultry  
16 source isolates from China, 55.7% of which belonged to L8 followed by L5 (22.8%)  
17 (**Table S3**), and there were two isolates of L8 from wild birds. By contrast, the  
18 majority of the bird source isolates from other countries came from wild birds, 53.3%  
19 of which did not belong to any of the 8 lineages while 33.3% were from L1. These  
20 findings demonstrated that the bird source *E. albertii* isolates from the other countries  
21 were phylogenetically different from the wild birds and poultry source isolates in  
22 China.

### 23 **In silico MLST of *E. albertii* isolates**

1 We performed *in silico* MLST on the isolates using the established *E. coli* scheme  
2 [29]. The 482 *E. albertii* isolates were subtyped into 98 STs, among which 53 STs  
3 contained  $\geq 2$  isolates. By lineage, with the exception of L1 and L8, each lineage  
4 was dominated by one ST. ST4633 accounted for 84.0% of the total number of  
5 isolates in L2, ST5431 for 76.0% of L3, ST4619 for 60.0% of L4, ST4638 for 81.3%  
6 of L5, ST5390 for 100% of L6 and ST3762 for 82.1% of L7. And 94.6% of L8  
7 belonged to 4 STs (ST4488, ST4634, ST4479 and ST4606). We further grouped  
8 closely related STs as CC using one allele difference [41]. Nearly half of the STs (43  
9 of 98) were grouped into 9 CCs while the remaining 55 STs were singletons (**Figure**  
10 **2A**). With the exception of L4 and L6 which only contained STs, the other lineages  
11 were dominated by one CC. CC1 represented 68.1% of the L1 isolates. CC2 to CC6  
12 were representative of more than 90% of the isolates in L2, L3, L5, L7 and L8  
13 respectively. The majority of the singletons (42 of 55) belonged to none of the 8  
14 lineages and were classified as other in the lineage division above.

15 Thirty-three STs were found in more than one country while 57 STs were only  
16 found in one country. The six largest CCs were found in more than one country.  
17 However, individual STs or CCs were predominant in different countries or regions.  
18 ST5390 was the most common ST in both USA and UK, and ST5431 was the second  
19 most common ST in the UK. In China, ST4479, ST4638 and ST4606 were the main  
20 STs, representing 54.7% of the Chinese isolates. CC1 and CC3 were predominant in  
21 the USA and UK while CC2, CC4, and CC6 were predominantly found in China.

## 22 **Virulence genes and their distribution in *E. albertii* lineages**

23 Virulence genes from *E. coli*\_VF database were screened to evaluate the potential  
24 pathogenicity of *E. albertii*. The LEE island from LEE1 to LEE7 contains 41 genes

1 [42]. The 41 genes were present in slightly different proportions ranging from 91.1%  
2 to 99.8%, with the *espF* gene the lowest in 439 of the 482 isolates (**Table S4**). The  
3 *eae* gene on LEE5 was harboured by 99.4% (479/482) of the isolates. Thirteen  
4 previously defined *eae* subtypes were observed in 387 (80.3%) of the 482 isolates,  
5 and 7 new *eae* subtypes were identified (which were observed in  $\geq 5$  isolates each)  
6 among the remaining 92 isolates (**Figure S2A**). Subtype sigma was the dominant type  
7 (37.9%), followed by rho (10.4%), itota2 (6.6%) and epsilon3 (6.2%) (**Figure S2B**).  
8 The *eae* subtypes were associated with specific lineages: epsilon3, itota2 and rho were  
9 the predominant subtypes in L2, L3, L5 respectively, and subtype sigma was  
10 dominant in L6, L7 and L8. However, L1, L4, L5 and L7 harboured multiple *eae*  
11 subtypes. L1 (or clade 1), possessed 8 *eae* subtypes, with beta3, alpha8 and the newly  
12 defined sigma2 and alpha9 as the main subtypes (**Figure S2C**).

13 Cdt facilitates bacterial survival and enhances pathogenicity [43] and is encoded by  
14 the *cdtABC* genes which were widely distributed in *E. albertii* [1, 44]. In this study,  
15 *cdtABC* genes were present in 99.4% (479/482) of the isolates. The *cdtB* gene had  
16 been previously divided into five subtypes (*cdtB*-I to *cdtB*-V), with *cdtB*-II/III/V as  
17 one group, and *cdtB*-I/IV as another group [45]. By phylogenetic analysis of the *cdtB*  
18 genes in *E. albertii*, a new *cdtB* subtype was identified and named as *cdtB*-VI. *E.*  
19 *albertii* *cdtB*-VI was phylogenetically closer to *cdtB* group II/III/V (**Figure S3**).  
20 Notably, almost all *cdtB*-VI positive *E. albertii* isolates (30.1%, 145/482) were  
21 located on the same branch that includes L3, L4 and L5 isolates (**Figure 1**). *CdtB*-II,  
22 as the dominant type, was present in 68.3% (329/482) of *E. albertii* isolates across 5  
23 lineages (L1, L2, L6, L7 and L8). *CdtB*-I was found in 65 (13.5%) *E. albertii* isolates,  
24 89.2% (58/65) of which were also positive for either *cdtB*-II or VI. There were 49  
25 isolates positive for *sxt2f* (10.2%, 49/482), 44 of which possessed *cdtB*-I (**Figure 1**).

1 *E. albertii* isolates with *cdtB*-I were significantly more likely to harbour *sxt2f* gene  
2 (Chi-Square test,  $P < 0.001$ ). Both *cdtB*-I and *sxt2f* were observed on the same intact  
3 prophage of two complete genomes (ASM331252v2\_PF4 and ASM386038v1\_PF5).  
4 None of the Chinese *E. albertii* isolates were positive for *sxt2f*.

5 ETT2, which plays a role in motility and serum resistance in *E. coli* [12], was found  
6 to be nearly intact in 61.4% (296/482) of the isolates, except for the *ygeF* gene which  
7 was absent in all *E. albertii* isolates [10]. Eighty-eight isolates (18.3%) harboured 29  
8 to 31 ETT2 genes with 2 to 4 genes missing. Interestingly, ETT2 genes were mostly  
9 deleted in L3 and L6 with only 4 and 3 genes remaining, respectively (**Figure 3**).  
10 Other virulence genes were also lineage restricted such as the type VI secretion  
11 system (T6SS) *aec* genes, which were present in most of the lineages except L1, L3  
12 and L5. The haemolysin genes *hlyABCD* were present only in L3 isolates (**Figure 3**).  
13 The *iuc* gene cluster (*iuc-ABCD* and *iutA*) which encodes aerobactin [46] was mainly  
14 present in L3, L4 and one isolate of L6. The *Yersinia* high pathogenicity island (HPI),  
15 which encodes the yersiniabactin (Ybt) [47], was only found in L6 isolates (100%).  
16 The *Ing* gene cluster that encodes the CS21 pilus (class b type IV) [48-50] was mainly  
17 observed in L5.

18 There were other *E. coli* virulence genes including *paa*, *efaI*, the bundle forming  
19 pilus (BFP) encoding *bfp* genes that were found to be variably present in *E. albertii*  
20 which are summarised in **Table S4**. One genome assembly (ERR1953722) from L5  
21 was found to harbour *Shigella* invasive plasmid pINV genes [51]. However, further  
22 investigation by read mapping found that it was most likely due to contamination  
23 (data not shown).

24 **Drug resistance genes and their high prevalence in some STs of *E. albertii***

1 Presence of AR genes was screened using NCBI AMRFinder database [13]. Among  
2 the 482 isolates, 52.3% (252/482) harboured AR genes, 41.9% (202/482) were MDR  
3 (harbouring AR genes resistant to  $\geq 3$  different drug classes), and 13.1% (63/482) of  
4 the isolates harboured genes capable of conferring resistance to 10 to 14 different drug  
5 classes that were regarded as highly resistant. Notably, 72.3% (146/202) of the  
6 predicted MDR isolates were from China with AR rate of 88.2% and MDR rate of  
7 85.9% with 61 isolates (35.9%) being predicted to be highly resistant. The predicted  
8 AR drug classes were shown in **Figure 4**, including sulfamethoxazole-trimethoprim,  
9 cephalosporin, streptomycin, beta-lactam antibiotics, etc. The antibiotic resistance  
10 genes observed in each isolate were shown in **Table S5**.

11 We determined resistance profiles by STs and found that some STs contained a  
12 high proportion of MDR isolates. The predicted MDR rates in ST4638, ST4479,  
13 ST4633 and ST4488 were  $\geq 80\%$  (**Figure 2B**). Additionally, 63.2% of the isolates in  
14 ST4606 were highly resistant. For the top 6 STs in China representing 84.7%  
15 (144/170) of the Chinese isolates, 94.8% (135/144) of the isolates were predicted to  
16 be MDR, and 41.7% (60/144) were highly resistant. In contrast, isolates from the  
17 USA and UK had relatively lower predicted MDR rate (26.2%, 39/149) and were  
18 mainly observed in ST5390, ST4619 and ST4638, with only one highly resistant  
19 isolate (**Figure 2**). By CCs, CC3, CC4 and CC6 had high MDR rate. CC1 carried  
20 hardly any resistance genes while CC3 and CC5 had low levels of carriage of  
21 resistance genes.

## 22 **Plasmids and plasmid associated drug resistance and virulence genes**

23 We firstly analysed the 17 complete *E. albertii* genomes for the carriage of plasmids.  
24 There were 34 intact plasmids ranging from 19,118 bp to 265,919 bp (**Table S6**).

1 Nineteen plasmids were previously reported [1, 14, 17], while 15 plasmids were  
2 newly identified in this study.

3 We further performed plasmid typing using PlasmidFinder and MOB-suite [23, 32].  
4 PlasmidFinder identifies plasmid by replicon types [23]. However, it should be noted  
5 that a plasmid may carry more than one replicon type. MOB-suite predicts plasmid  
6 using the relaxase gene and group those predicted plasmids into different MOB types  
7 [32]. However, some plasmids have no relaxase genes. Thus, both methods were used  
8 to predict and identify plasmids in all *E. albertii* isolates. Among the 482 *E. albertii*  
9 isolates, PlasmidFinder found that 86.7% (418/482) of the isolates harboured  
10 plasmids, with a total of 54 replicon types detected. There were 34 replicon types that  
11 each was present in more than 10 isolates. And 26 replicon types were found to be  
12 significantly associated with lineages ( $P < 0.001$ ) (**Table S7**): for example,  
13 IncFII(29)\_1\_pUTI89 type with L2, Col156\_1 with L3, and IncFII (pSE11)\_1 with  
14 L4, IncX1\_1 with L5 and L8. By MOB-suite, a total of 1854 plasmid sequences were  
15 predicted in 427 of the 482 isolates with an average of 4.3 plasmids per genome while  
16 55 isolates had no plasmids predicted. The vast majority (90.3%, 1674/1854) of the  
17 predicted plasmids were grouped into 170 MOB types with the remaining 9.7%  
18 (180/1854) being novel with no MOB types. There were 47 MOB types each of which  
19 was present in  $\geq 10$  isolates, 36 of which were significantly associated with lineages,  
20 which is concordant with findings from replicon types (**Table S7**). Additionally, there  
21 were 64 isolates without both replicon types and MOB types observed, including  
22 77.3% (17/22) of L6 isolates (**Figure 3**). However, 35.9% (23/64) of these isolates  
23 harboured AR genes, especially 72.3% of L6 were predicted to be MDR.

24 Plasmids are known to be responsible for the acquisition of MDR genes. Among the  
25 34 intact plasmids, 9 were found to harbour AR genes (**Table S6**). One newly



1 identified MDR plasmid, ESA136\_plas1 (MOB type AA738), which contained 15 AR  
2 genes resistant against 13 drug classes, harboured IncHI2\_1, IncHI2A\_1 and RepA\_1  
3 replicon types.

4 Statistical association between MDR and the plasmid types were evaluated. By  
5 PlasmidFinder, 13 replicon types were found significantly associated with MDR ( $P <$   
6  $0.001$ , Chi-square test) (**Figure S4**). However, this analysis may be biased when the  
7 MDR genes were not located on the same plasmid with the replicon genes. This bias  
8 can be resolved by MOB-suite, which offers the predicted plasmid sequences from the  
9 draft genomes. We screened the plasmid replicon genes and MDR gene on the MOB-  
10 suite predicted plasmids. Ten replicon types were confirmed to be significantly more  
11 likely to be observed in MDR isolates ( $P < 0.001$ ) including IncQ\_1, IncN\_1,  
12 ColE10\_1, IncHI2A\_1, RepA\_1, IncHI2\_1, IncFII(pSE11)\_1, IncX9\_1,  
13 IncFII(pHN7A8)\_1, and IncX1\_1. The predicted odds ratio (OR) values ranged from  
14 6.1 to infinity (**Figure 5A**). Further, each MOB type possessed 1 to 8 plasmid replicon  
15 genes, indicating MOB typing is of higher resolution than replicon typing (**Table S7**).  
16 Five MOB types AE928, AA860, AA738, AA334 and AA327 were significantly  
17 associated with MDR genes ( $P < 0.001$ , OR 15.0 to infinity) (**Figure 5B**). Importantly,  
18 the MDR associated replicon types and MOB types were mainly observed in L4, L5  
19 and L8, which had a high proportion of MDR isolates.

20 Lastly, association of virulence genes with plasmids were evaluated. Among the 34  
21 intact plasmids, 27 harboured virulence genes. Two plasmids from bat source isolates  
22 harboured the Type II secretion system and the putative heat-stable enterotoxin gene  
23 *astA* [52] (**Table S6**). Moreover, some lineage restricted virulence genes were  
24 observed in the MOB suite predicted plasmids, including the *LngA-LngX* gene cluster,  
25 the *iucA-iucD* gene cluster, and the *hlyABCD* gene cluster.

## 1 **Prophages and carriage of resistance and virulence genes**

2 PHASTER was used to search for prophages in the 17 complete genomes first [34]. A  
3 total of 207 prophages were identified: 130 were intact, 50 were incomplete and 27  
4 were indeterminant (**Table S9**). The size of the intact prophage genomes ranged from  
5 11.163 to 98.311 kb. Most of the intact prophages were integrated on the  
6 chromosomes with 11 (8.5%) being on plasmids.

7 We grouped the 130 intact prophages based on a tree generated using the  
8 presence/absence of prophage genes using Roary v3.11.2 [36], and a nucleotide  
9 dotplot generated using Gepard v1.3 [37]. Gepard was a useful method for grouping  
10 diverse prophages [53]. As seen in **Figure 6**, the darker the colour in the dotplot, the  
11 more similar the sequences were. There were 5 main squares with dense dots  
12 corresponding to 5 main groups of prophages (G1-G5). G5 was more diverse and  
13 potentially can be further subdivided subgroups. Of prophages in G1 and G2, 50%  
14 (4/8) and 85.7% (6/7) (respectively) were from the two bat source isolates.

15 Based on the annotation of the 130 intact prophages, genes that were present only in  
16 one prophage group were identified using Scoary [38], and were designated as group  
17 specific gene markers for each of the prophage groups. By screening the group  
18 specific genes among the draft genomes, G1 was predicted be present in 34.4%  
19 (166/482) of the *E. albertii* isolates, with at least two specific genes of G1 identified  
20 in these genomes. G2 was predicted to be in 3.7%, G3 in 46.7%, G4 in 59.1% and G5  
21 in 96.1% of the 482 *E. albertii* isolates (**Figure S5**). In terms of lineage distribution,  
22 G3 prophage specific genes were more likely to be observed in L5 and L8, and G4  
23 prophages in L3, L4 and L8 ( $P < 0.001$ , OR value  $> 3.9$ ). G1 prophage specific genes

1 were negatively associated with L3 and L6, G3 prophages with L2, L3, L6 and L7,  
2 and G4 prophages with L2, L5, L6 and L7 ( $P < 0.001$ , OR value  $< 0$ ).

3 There were 27 T3SS non-LEE effector genes present in 59 of the 130 intact  
4 prophages, 64.7% of which were in G5 prophages (**Table S9**). Two intact G5  
5 prophages were positive for both *stx2f* and *cdtABC* genes. Additionally, there were 3  
6 intact prophages harbouring AR genes and all 3 were located on plasmids.

7 The MVP database collected viral genomes and prophage sequences from bacterial  
8 and archaeal genomes [40]. Those virus and prophage genomes were clustered based  
9 on their sequence similarity, with unified cluster types assigned [40]. By nucleotide  
10 comparison with the MVP representative phage clusters database using BLASTN,  
11 only 13.1% (17/130) of the intact prophage sequences were previously recorded in the  
12 MVP database, belonging to 15 phage cluster types (**Figure 6A**), indicating high  
13 diversity of prophages in *E. albertii* which have not been recorded in the database.  
14 Interspecies transmissions of prophages were observed: among the 15 MVP phage  
15 clusters, 11 prophages were previously observed in *E. coli*; cluster 12645 was  
16 previously observed in both *E. coli* and *Salmonella enterica*; and cluster 17047 from  
17 *Salmonella enterica*, while 5 phage clusters were only observed in *E. albertii*. In the 5  
18 groups of prophages, MVP phage clusters were observed in G1, G3, G4 and G5,  
19 indicating G2 is a new prophage group specific for *E. albertii*.

## 20 **Discussion**

21 *E. albertii* is a newly defined species of *Escherichia*, with infections previously  
22 wrongly attributed to *E. coli* and *Shigella* owing to the lack of sufficient subtyping  
23 techniques [1, 2, 18]. The *eae* gene and *cdtB* gene have since been used for *E. albertii*  
24 identification [9, 21, 54]. However, both genes were not present in all *E. albertii*

1 isolates or unique to *E. albertii*. In this work, only *eae* positive samples were cultured  
2 for *E. albertii*, which would have missed any potential *eae* negative *E. albertii*  
3 isolates.

4 Previous study defined two clades of *E. albertii*, which was supported by this study  
5 [18]. Further, a total of 8 robust lineages were defined in this study. Clade 1  
6 corresponds to L1, and clade 2 was further divided into 7 lineages (L2 to L8). The  
7 genomic features of these lineages were characterized. Based on the 7 gene MLST of  
8 *E. coli* [29], lineage representative STs (e.g. ST4638 for L5 and ST5390 L6) and CCs  
9 were identified. The stable and unified nomenclature characteristics of STs are more  
10 efficient in the global surveillance system [55]. Thus, using STs or CCs as hallmarks  
11 for different lineages of *E. albertii* will be useful when genomic information is not  
12 available, which would facilitate comparison between different studies and  
13 surveillance of global spread and MDR. Although the isolates sequenced may not be  
14 representative, lineages were of significantly different proportions in different  
15 geographic regions: L5 (represented by ST4638) and L8 (represented by 4 STs) were  
16 more common in China, and L3 and L6 were only observed in Europe and North  
17 America. This study showed the high diversity of *E. albertii*, and more lineages are  
18 likely to be identified with more isolates sequenced. Isolates causing human infection  
19 were observed in all 8 lineages, indicating all lineages are potentially pathogenic.

## 20 **Virulence gene variation in different lineages of *E. albertii***

21 The T3SS and the Cdt are the main virulence factors present in the vast majority of  
22 the *E. albertii* isolates. However, the subtypes of *eae* and *cdtB* were phylogenetically  
23 diverse. The *eae* gene was more diverse than the *cdtB* gene, and different lineages  
24 were dominated by different *eae* subtypes. Thus, it is likely that multiple independent

1 acquisitions of the *eae* subtypes have occurred in *E. albertii*. There were 7 new *eae*  
2 subtypes identified, and these *eae* subtypes were phylogenetically distant from each  
3 other, indicating potential independent acquisition. It is also possible that these new  
4 *eae* subtypes evolved within *E. albertii*. For the *cdtB* gene, *cdtB*-II was dominant and  
5 present in all lineages except L3, L4 and L5 whereas the newly defined *cdtB*-VI was  
6 found in L3, L4 and L5. Given the phylogenetic relationship of the lineages, *cdtB*-VI  
7 must have replaced *cdtB*-II in L3-L5. However, it is unclear if the *cdtB*-VI evolved  
8 within *E. albertii* or was acquired from other species. Moreover, some subtypes of *eae*  
9 and *cdtB* were prevalent in *E. coli* but were rare in *E. albertii* and vice versa. For  
10 example, *cdtB*-III and V were common in Shiga toxin-producing *E. coli* (STEC), but  
11 were not observed in *E. albertii* [44, 56]; the *E. coli* prevalent *eae* subtypes were not  
12 common in *E. albertii* [57]; and the *eae* *iota2* was observed in *S. boydii* serovar 13  
13 isolates, which are in fact *E. albertii* [58]. The *eae* and *cdt* virulence genes seemed to  
14 have been acquired by *E. albertii* multiple times during its long evolutionary history.  
15 More studies are required to elucidate the interspecies and inter-species transfer of *eae*  
16 and *cdt* genes in the genus *Escherichia*.

17 Some virulence genes and pathogenicity islands were found to be associated with  
18 certain lineages. ETT2, which contributes to motility and serum resistance (which is  
19 essential for the invasive infections) in *E. coli* [12], was truncated in L3 and L6, while  
20 in the other lineages only the *yqeF* gene of ETT2 was absent. Experimental evaluation  
21 is required to determine whether ETT2 is functional without the *yqeF* gene in *E.*  
22 *albertii*. *Yersinia* HPI encodes the siderophore yersiniabactin (Ybt) for iron  
23 scavenging, which causes oxidative stress in host cells and contributes to the invasive  
24 extra-intestinal infections [47]. HPI comprises 11 genes, all of which were only  
25 observed in L6 isolates of *E. albertii*. Moreover, the *iuc* gene cluster include the

1 *iucABCD* encoded the siderophore aerobactin and the *iutA* encoded ferric aerobactin  
2 were also associated with iron acquisition [46, 47]. The *iuc* gene cluster was mainly  
3 present in L3, L4 and one isolate of L6. More studies are required to evaluate the  
4 pathogenicity of those lineages that were equipped with different iron uptake systems.  
5 There were other lineage restricted virulence genes like T6SS, *hlyABCD* and the *lng*  
6 gene cluster. Although their expression remains unknown, these lineage restricted  
7 virulence factors may result in variation of the pathogenicity and environmental  
8 survival of different lineages [12, 50, 59].

9 Plasmid mediated acquisition of virulence genes was observed in *E. albertii*. The  
10 lineage restricted *hlyABCD* genes, the *iuc* gene cluster and the *lng* gene cluster were  
11 observed in MOB-suite predicted plasmids, indicating plasmid mediated acquisition,  
12 which was supported by previously studies in *E. coli* [46, 50, 59]. The two *E. albertii*  
13 isolates from bats harboured a plasmid with T2SS genes and the metalloprotease  
14 encoding *stcE* gene. T2SS genes are critical for the survival and pathogenicity of  
15 bacteria [60]. And *stcE* gene, which is located on pO157 plasmid, contributes to the  
16 intimate adherence of EHEC and atypical *S. boydii* 13 [61, 62]. Like plasmids,  
17 prophages were also found to have contributed to the acquisition of virulence genes in  
18 *E. albertii*. The non-LEE effector genes of the T3SS were observed in intact  
19 prophages, which were found to be significantly associated with G5 prophages  
20 defined in this study. A previous report that lambdoid prophages carried various T3SS  
21 secretion effectors supports this finding [11]. Altogether, plasmids and prophages play  
22 key roles in the transfer of virulence genes in *E. albertii* and may facilitate large  
23 changes in pathogenicity like those seen in the pathovars of *E. coli* [16].

24 **Plasmid mediated AR genes were significantly associated with STs and**  
25 **geographic regions**

1 The predicted MDR rate in Chinese *E. albertii* isolates is astonishingly high (85.9%,  
2 146/170), with 35.9% highly resistant isolates. These results are supported by  
3 previous phenotypic results, which found isolates resistant to up 14 clinically relevant  
4 drugs and 11 drug classes [14]. Importantly resistance was observed to clinically  
5 relevant drug classes including sulfamethoxazole-trimethoprim, cephalosporin,  
6 streptomycin and beta-lactam antibiotics [63]. There is an urgent need for surveillance  
7 and control of the spread of MDR and using MLST, we identified some STs that were  
8 associated with MDR *E. albertii* in China. ST4638, ST4479, ST4633 and ST4488  
9 carried proportionally more MDR isolates and were mainly from China, which should  
10 facilitate the surveillance of the MDR. The MDR in North America and Europe is  
11 emerging and the MDR associated STs from these continents were different from  
12 those of China. This may be due to the different control strategies for antibiotic use in  
13 different countries. Plasmid transmission is the main pathway to acquire antibiotic  
14 resistance gene. In this study, we identified plasmid types that are significantly  
15 associated with MDR using both PlasmidFinder and MOB-Suite [23, 32]. The MDR  
16 associated plasmid types would facilitate the surveillance and control of MDR spread.  
17 Moreover, most of the L6 isolates harboured AR/MDR genes without predicted  
18 plasmids observed, which indicates potential new plasmids or prophages, or other  
19 means of MDR acquisition in L6.

20

## 21 **Conclusion**

22 In this study, the population structure of *E. albertii* was elucidated based on 169  
23 genomes from China and 383 genomes from other countries. There were 8 lineages  
24 identified, 7 of which (L2-L8) belonged to previously defined clade 2. Isolates from

1 clinical infections were found in all lineages suggesting that much of *E. albertii* has  
2 some pathogenicity. However, the uneven distribution of many virulence factors  
3 suggests that the degree of pathogenicity may differ across the lineages. The predicted  
4 MDR rate and MDR gene profiles varied between regions, STs and CCs, with  
5 Chinese isolates and STs being predominantly MDR. Plasmid replicon and MOB  
6 types that were significantly associated with MDR were identified. *E. albertii*  
7 contained a large number of prophages and were divided into 5 groups, with G5  
8 prophages found to have contributed to the acquisition of the T3SS non-LEE effector  
9 genes. Therefore, prophages and plasmids played key roles in creating the virulence  
10 and MDR repertoires of *E. albertii*. Our findings provided fundamental insights into  
11 the population structure, virulence variation and MDR of *E. albertii*.

## 12 **Funding**

13 This work was supported by National Key Research and Development Program of  
14 China (2017YFC1601502), State Key Laboratory of Infectious Disease Prevention  
15 and Control, China CDC (2016SKLID309), and an Australian Research Council  
16 Discovery Grant (DP170101917). Lijuan Luo was supported by a UNSW scholarship  
17 (University International Postgraduate Award).

## 18 **Acknowledgements**

19 Zigong CDC and L. L. acknowledge and commemorate Mr Yimao Miao for the  
20 guidance in all research studies in Zigong CDC, China. The authors thank Duncan  
21 Smith and Robin Heron from UNSW Research Technology Services for technical  
22 assistance.

## 23 **Authors' contribution**



1 L.L., M.P., R.L., Y.X. H.W. and Q.L. designed the study. H.W., L.Z., L.B., G.Y., Z.Z,  
2 Z.W., Y.X. and Q.L. collected the isolates and sequenced genomes. L.L., C.L. and  
3 H.Z. curated the data. L.L, R.L, M.P, C.L. and X.Z. analysed the results, R.L., M.P.,  
4 Y.X. and L.B. provided critical analysis and discussions. L.L. wrote the first draft.  
5 M.P. and R.L revised the drafts. All authors approved the final manuscript.

## 6 **Competing interests**

7 The authors declare that they have no competing interests.

8

## 9 **References**

- 10 1. **Gomes TAT, Ooka T, Hernandes RT, Yamamoto D, Hayashi T.**  
11 *Escherichia albertii* Pathogenesis. *EcoSal Plus* 2020;9(1):1-18.
- 12 2. **Huys G, Cnockaert M, Janda JM, Swings J.** *Escherichia albertii* sp. nov., a  
13 diarrhoeagenic species isolated from stool specimens of Bangladeshi children.  
14 *Int J Syst Evol Microbiol* 2003;53(Pt 3):807-810.
- 15 3. **Albert MJ, Alam K, Islam M, Montanaro J, Rahaman AS et al.** *Hafnia*  
16 *alvei*, a probable cause of diarrhea in humans. *Infect Immun* 1991;59(4):1507.
- 17 4. **Ooka T, Seto K, Kawano K, Kobayashi H, Etoh Y et al.** Clinical  
18 significance of *Escherichia albertii*. *Emerg Infect Dis* 2012;18(3):488-492.
- 19 5. **Inglis TJ, Merritt AJ, Bzdyl N, Lansley S, Urosevic MN.** First bacteraemic  
20 human infection with *Escherichia albertii*. *New Microbes New Infect*  
21 2015;8:171-173.
- 22 6. **Janda JM, Abbott SL, Albert MJ.** Prototypal diarrheagenic strains of *Hafnia*  
23 *alvei* are actually members of the genus *Escherichia*. *J Clin Microbiol*  
24 1999;37(8):2399-2401.

- 1 7. **Ooka T, Tokuoka E, Furukawa M, Nagamura T, Ogura Y et al.** Human  
2 gastroenteritis outbreak associated with *Escherichia albertii*, Japan. *Emerg*  
3 *Infect Dis* 2013;19(1):144-146.
- 4 8. **Oaks JL, Besser TE, Walk ST, Gordon DM, Beckmen KB et al.**  
5 *Escherichia albertii* in wild and domestic birds. *Emerg Infect Dis*  
6 2010;16(4):638-646.
- 7 9. **Wang H, Li Q, Bai X, Xu Y, Zhao A et al.** Prevalence of eae-positive,  
8 lactose non-fermenting *Escherichia albertii* from retail raw meat in China.  
9 *Epidemiol Infect* 2016;144(1):45-52.
- 10 10. **Ooka T, Ogura Y, Katsura K, Seto K, Kobayashi H et al.** Defining the  
11 Genome Features of *Escherichia albertii*, an Emerging Enteropathogen  
12 Closely Related to *Escherichia coli*. *Genome Biol Evol* 2015;7(12):3170-3179.
- 13 11. **Tobe T, Beatson SA, Taniguchi H, Abe H, Bailey CM et al.** An extensive  
14 repertoire of type III secretion effectors in *Escherichia coli* O157 and the role  
15 of lambdoid phages in their dissemination. *Proc Natl Acad Sci U S A*  
16 2006;103(40):14941-14946.
- 17 12. **Shulman A, Yair Y, Biran D, Sura T, Otto A et al.** The *Escherichia coli*  
18 Type III Secretion System 2 Has a Global Effect on Cell Surface. *mBio*  
19 2018;9(4):e01070-01018.
- 20 13. **Feldgarden M, Brover V, Haft DH, Prasad AB, Slotta DJ et al.** Validating  
21 the AMRFinder Tool and Resistance Gene Database by Using Antimicrobial  
22 Resistance Genotype-Phenotype Correlations in a Collection of Isolates.  
23 *Antimicrob Agents Chemother* 2019;63(11):e00483-00419.

- 1 14. **Li Q, Wang H, Xu Y, Bai X, Wang J et al.** Multidrug-Resistant *Escherichia*  
2 *albertii*: Co-occurrence of beta-Lactamase and MCR-1 Encoding Genes. *Front*  
3 *Microbiol* 2018;9:258.
- 4 15. **Lima MP, Yamamoto D, Santos ACM, Ooka T, Hernandez RT et al.**  
5 Phenotypic characterization and virulence-related properties of *Escherichia*  
6 *albertii* strains isolated from children with diarrhea in Brazil. *Pathog Dis*  
7 2019;77(2):1-13.
- 8 16. **Nakamura K, Murase K, Sato MP, Toyoda A, Itoh T et al.** Differential  
9 dynamics and impacts of prophages and plasmids on the pangenome and  
10 virulence factor repertoires of Shiga toxin-producing *Escherichia coli*  
11 O145:H28. *Microb Genom* 2020;6(1):1-13.
- 12 17. **Lindsey RL, Rowe LA, Batra D, Smith P, Strockbine NA.** PacBio Genome  
13 Sequences of Eight *Escherichia albertii* Strains Isolated from Humans in the  
14 United States. *Microbiol Resour Announc* 2019;8(9):1-3.
- 15 18. **Ooka T, Seto K, Ogura Y, Nakamura K, Iguchi A et al.** O-antigen  
16 biosynthesis gene clusters of *Escherichia albertii*: their diversity and similarity  
17 to *Escherichia coli* gene clusters and the development of an O-genotyping  
18 method. *Microb Genom* 2019;5(11):e000314.
- 19 19. **Shen R, Fan JB, Campbell D, Chang W, Chen J et al.** High-throughput  
20 SNP genotyping on universal bead arrays. *Mutat Res* 2005;573(1-2):70-82.
- 21 20. **Eid J, Fehr A, Gray J, Luong K, Lyle J et al.** Real-time DNA sequencing  
22 from single polymerase molecules. *Science* 2009;323(5910):133-138.
- 23 21. **Lindsey RL, Garcia-Toledo L, Fasulo D, Gladney LM, Strockbine N.**  
24 Multiplex polymerase chain reaction for identification of *Escherichia coli*,

- 1           *Escherichia albertii* and *Escherichia fergusonii*. *J Microbiol Methods*  
2           2017;140:1-4.
- 3   22.   **Souvorov A, Agarwala R, Lipman DJ.** SKESA: strategic k-mer extension  
4           for scrupulous assemblies. *Genome Biol* 2018;19(1):153.
- 5   23.   **Carattoli A, Zankari E, Garcia-Fernandez A, Voldby Larsen M, Lund O**  
6           **et al.** *In silico* detection and typing of plasmids using PlasmidFinder and  
7           plasmid multilocus sequence typing. *Antimicrob Agents Chemother*  
8           2014;58(7):3895-3903.
- 9   24.   **Croucher NJ, Page AJ, Connor TR, Delaney AJ, Keane JA et al.** Rapid  
10           phylogenetic analysis of large samples of recombinant bacterial whole genome  
11           sequences using Gubbins. *Nucleic Acids Res* 2015;43(3):e15.
- 12   25.   **Kumar S, Stecher G, Li M, Knyaz C, Tamura K.** MEGA X: Molecular  
13           Evolutionary Genetics Analysis across Computing Platforms. *Mol Biol Evol*  
14           2018;35(6):1547-1549.
- 15   26.   **Hu D, Liu B, Wang L, Reeves PR.** Living Trees: High-Quality Reproducible  
16           and Reusable Construction of Bacterial Phylogenetic Trees. *Mol Biol Evol*  
17           2020;37(2):563-575.
- 18   27.   **Tonkin-Hill G, Lees JA, Bentley SD, Frost SDW, Corander J.** Fast  
19           hierarchical Bayesian analysis of population structure. *Nucleic Acids Res*  
20           2019;47(11):5539-5549.
- 21   28.   **Letunic I, Bork P.** Interactive Tree Of Life (iTOL) v4: recent updates and  
22           new developments. *Nucleic Acids Res* 2019;47(W1):W256-W259.
- 23   29.   **Wirth T, Falush D, Lan R, Colles F, Mensa P et al.** Sex and virulence in  
24           *Escherichia coli*: an evolutionary perspective. *Mol Microbiol*  
25           2006;60(5):1136-1151.

- 1 30. **Chen L, Zheng D, Liu B, Yang J, Jin Q.** VFDB 2016: hierarchical and  
2 refined dataset for big data analysis--10 years on. *Nucleic Acids Res*  
3 2016;44(D1):D694-D697.
- 4 31. **Ito K, Iida M, Yamazaki M, Moriya K, Moroishi S et al.** Intimin types  
5 determined by heteroduplex mobility assay of intimin gene (eae)-positive  
6 *Escherichia coli* strains. *J Clin Microbiol* 2007;45(3):1038-1041.
- 7 32. **Robertson J, Nash JHE.** MOB-suite: software tools for clustering,  
8 reconstruction and typing of plasmids from draft assemblies. *Microb Genom*  
9 2018;4(8).
- 10 33. **Zhang X, Payne M, Nguyen T, Kaur S, Lan R.** Cluster-specific gene  
11 markers enhance *Shigella* and Enteroinvasive *Escherichia coli* *in silico*  
12 serotyping. *bioRxiv* 2021:2021.2001.2030.428723.
- 13 34. **Arndt D, Grant JR, Marcu A, Sajed T, Pon A et al.** PHASTER: a better,  
14 faster version of the PHAST phage search tool. *Nucleic Acids Res*  
15 2016;44(W1):W16-W21.
- 16 35. **Seemann T.** Prokka: rapid prokaryotic genome annotation. *Bioinformatics*  
17 2014;30(14):2068-2069.
- 18 36. **Page AJ, Cummins CA, Hunt M, Wong VK, Reuter S et al.** Roary: rapid  
19 large-scale prokaryote pan genome analysis. *Bioinformatics*  
20 2015;31(22):3691-3693.
- 21 37. **Krumsiek J, Arnold R, Rattei T.** Gepard: a rapid and sensitive tool for  
22 creating dotplots on genome scale. *Bioinformatics* 2007;23(8):1026-1028.
- 23 38. **Brynildsrud O, Bohlin J, Scheffer L, Eldholm V.** Rapid scoring of genes in  
24 microbial pan-genome-wide association studies with Scoary. *Genome Biol*  
25 2016;17(1):238.

- 1 39. **Hadfield J, Croucher NJ, Goater RJ, Abudahab K, Aanensen DM et al.**  
2 Phandango: an interactive viewer for bacterial population genomics.  
3 *Bioinformatics* 2018;34(2):292-293.
- 4 40. **Gao NL, Zhang C, Zhang Z, Hu S, Lercher MJ et al.** MVP: a microbe-  
5 phage interaction database. *Nucleic Acids Res* 2018;46(D1):D700-D707.
- 6 41. **Feil EJ, Li BC, Aanensen DM, Hanage WP, Spratt BG.** eBURST: inferring  
7 patterns of evolutionary descent among clusters of related bacterial genotypes  
8 from multilocus sequence typing data. *J Bacteriol* 2004;186(5):1518-1530.
- 9 42. **Gaytan MO, Martinez-Santos VI, Soto E, Gonzalez-Pedrajo B.** Type Three  
10 Secretion System in Attaching and Effacing Pathogens. *Front Cell Infect*  
11 *Microbiol* 2016;6:129.
- 12 43. **Pickett CL, Whitehouse CA.** The cytolethal distending toxin family. *Trends*  
13 *Microbiol* 1999;7(7):292-297.
- 14 44. **Hinenoya A, Yasuda N, Mukaizawa N, Sheikh S, Niwa Y et al.** Association  
15 of cytolethal distending toxin-II gene-positive *Escherichia coli* with  
16 *Escherichia albertii*, an emerging enteropathogen. *Int J Med Microbiol*  
17 2017;307(8):564-571.
- 18 45. **Toth I, Nougayrede JP, Dobrindt U, Ledger TN, Boury M et al.** Cytolethal  
19 distending toxin type I and type IV genes are framed with lambdoid prophage  
20 genes in extraintestinal pathogenic *Escherichia coli*. *Infect Immun*  
21 2009;77(1):492-500.
- 22 46. **Ling J, Pan H, Gao Q, Xiong L, Zhou Y et al.** Aerobactin synthesis genes  
23 iucA and iucC contribute to the pathogenicity of avian pathogenic *Escherichia*  
24 *coli* O2 strain E058. *PLoS One* 2013;8(2):e57794.

- 1 47. **Galardini M, Clermont O, Baron A, Busby B, Dion S et al.** Major role of  
2 iron uptake systems in the intrinsic extra-intestinal virulence of the genus  
3 *Escherichia* revealed by a genome-wide association study. *PLoS Genet*  
4 2020;16(10):e1009065.
- 5 48. **Giron JA, Gomez-Duarte OG, Jarvis KG, Kaper JB.** Longus pilus of  
6 enterotoxigenic *Escherichia coli* and its relatedness to other type-4 pili--a  
7 minireview. *Gene* 1997;192(1):39-43.
- 8 49. **Gomez-Duarte OG, Chattopadhyay S, Weissman SJ, Giron JA, Kaper JB**  
9 **et al.** Genetic diversity of the gene cluster encoding longus, a type IV pilus of  
10 enterotoxigenic *Escherichia coli*. *J Bacteriol* 2007;189(24):9145-9149.
- 11 50. **Saldana-Ahuactzi Z, Rodea GE, Cruz-Cordova A, Rodriguez-Ramirez V,**  
12 **Espinosa-Mazariego K et al.** Effects of lng Mutations on LngA Expression,  
13 Processing, and CS21 Assembly in Enterotoxigenic *Escherichia coli* E9034A.  
14 *Front Microbiol*, Original Research 2016;7(1201):1201.
- 15 51. **Octavia S, Lan R.** *Shigella* and Shigellosis. In: Tang Y-W, Sussman M, Liu  
16 D, Poxton I, Schwartzman J (editors). *Molecular Medical Microbiology*.  
17 Boston: Academic Press; 2015. pp. 1147-1168.
- 18 52. **Savarino SJ, Fasano A, Watson J, Martin BM, Levine MM et al.**  
19 Enteroaggregative *Escherichia coli* heat-stable enterotoxin 1 represents  
20 another subfamily of *E. coli* heat-stable toxin. *Proc Natl Acad Sci U S A*  
21 1993;90(7):3093-3097.
- 22 53. **Bleriot I, Trastoy R, Blasco L, Fernandez-Cuenca F, Ambroa A et al.**  
23 Genomic analysis of 40 prophages located in the genomes of 16  
24 carbapenemase-producing clinical strains of *Klebsiella pneumoniae*. *Microb*  
25 *Genom* 2020;6(5):1-18.

- 1 54. **Hinenoya A, Ichimura H, Yasuda N, Harada S, Yamada K et al.**  
2 Development of a specific cytolethal distending toxin (cdt) gene (Eacdt)-based  
3 PCR assay for the detection of *Escherichia albertii*. *Diagn Microbiol Infect*  
4 *Dis* 2019;95(2):119-124.
- 5 55. **Payne M, Kaur S, Wang Q, Hennessy D, Luo L et al.** Multilevel genome  
6 typing: genomics-guided scalable resolution typing of microbial pathogens.  
7 *Euro Surveill* 2020;25(20):1900519.
- 8 56. **Hinenoya A, Shima K, Asakura M, Nishimura K, Tsukamoto T et al.**  
9 Molecular characterization of cytolethal distending toxin gene-positive  
10 *Escherichia coli* from healthy cattle and swine in Nara, Japan. *BMC Microbiol*  
11 2014;14(1):97.
- 12 57. **Yang K, Pagaling E, Yan T.** Estimating the prevalence of potential  
13 enteropathogenic *Escherichia coli* and intimin gene diversity in a human  
14 community by monitoring sanitary sewage. *Appl Environ Microbiol*  
15 2014;80(1):119-127.
- 16 58. **Hyma KE, Lacher DW, Nelson AM, Bumbaugh AC, Janda JM et al.**  
17 Evolutionary genetics of a new pathogenic *Escherichia* species: *Escherichia*  
18 *albertii* and related *Shigella boydii* strains. *J Bacteriol* 2005;187(2):619-628.
- 19 59. **Schwidder M, Heinisch L, Schmidt H.** Genetics, Toxicity, and Distribution  
20 of Enterohemorrhagic *Escherichia coli* Hemolysin. *Toxins (Basel)*  
21 2019;11(9):502.
- 22 60. **Patrick M, Gray MD, Sandkvist M, Johnson TL.** Type II Secretion in  
23 *Escherichia coli*. *EcoSal Plus* 2010;4(1).



- 1 61. **Grys TE, Siegel MB, Lathem WW, Welch RA.** The StcE protease  
2 contributes to intimate adherence of enterohemorrhagic *Escherichia coli*  
3 O157:H7 to host cells. *Infect Immun* 2005;73(3):1295-1303.
- 4 62. **Walters LL, Raterman EL, Grys TE, Welch RA.** Atypical *Shigella boydii*  
5 13 encodes virulence factors seen in attaching and effacing *Escherichia coli*.  
6 *FEMS Microbiol Lett* 2012;328(1):20-25.
- 7 63. **Eyler RF, Shvets K.** Clinical Pharmacology of Antibiotics. *Clin J Am Soc*  
8 *Nephrol* 2019;14(7):1080-1090.

9

10

1 **Figure legends:**

2 **Figure 1. Phylogenetic structure of *E. albertii*.** The phylogenetic tree of the 482 *E.*  
3 *albertii* isolates was constructed using Quicktree with bootstraps of 1000 [26]. The  
4 colour of the branches represented the percentage of bootstrap supporting from 10%  
5 to 100% (from red to green). The inner most ring marks the isolates from human  
6 clinical source. The next ring marks the lineages by colour as shown in the colour  
7 legend. The outer 4 rings represented the *cdtB* subtypes and the *stx<sub>2f</sub>* gene, which were  
8 represented with different colours as shown in the colour legend.

9

10 **Figure 2. Region distribution and resistance profiles of clonal complex (CC) and**  
11 **sequence type (ST) of *E. albertii* isolates based on the 7 gene multi-locus sequence**  
12 **typing (MLST).** (A). Region distribution of STs and CCs. (B). Drug resistance  
13 profiles of STs and CCs. Each circle represented an ST and the size of the circles  
14 reflected the number of isolations. STs and CCs belonging to different lineages were  
15 separated. STs with one allele difference were linked with solid lines as one CC.  
16 Singleton STs were shown for each lineage. While for the 42 singleton STs belonging  
17 to none of the 8 lineages, only 12 STs with AR genes were shown. The top 7 countries  
18 with 5 or more isolates were highlighted in different colours as shown in the colour  
19 legend. Antibiotic resistance of different STs is denoted by different colours of  
20 different level of resistance as shown in the colour legend. The pie chart within an ST  
21 denotes of different proportions of isolates displaying a particular characteristic.

22

23 **Figure 3. Virulence genes that were significantly associated with different**  
24 **lineages of *E. albertii*.** The distribution of different virulence genes in *E. albertii* were

1 visualized using Phandango [39]. The lineages of *E. albertii* were labelled with  
2 different colours. The presence of a gene was marked with a coloured box. Only  
3 genes or gene clusters significantly associated with lineages are shown.

4

5 **Figure 4. Predicted resistance to drug classes in *E. albertii*.** *E. albertii* isolates that  
6 harboured genes conferring resistance to different drug classes are shown in purple.  
7 The two columns headed with 1 and 2 denote combination of 2 drugs as follows: 1 =  
8 chloramphenicol and florfenicol, 2 = phenicol and quinolone. Isolates with predicted  
9 plasmids by PlasmidFinder and MOB suite (respectively) were also highlighted.

10

11 **Figure 5. Multidrug resistance (MDR) associated plasmid subtypes.** (A). Replicon  
12 types detected. (B). MOB types detected. Those types significantly associated with  
13 MDR are marked with P value < 0.001 (\*\*\*). The proportion of drug resistance (%)  
14 for each replicon or MOB type was shown as colour legend.

15

16 **Figure 6. Clustering of the intact prophages of *E. albertii*.** (A). Accessory binary  
17 gene presence tree of the prophages constructed using Roary v3.11.2 [36]. The 5 main  
18 groups of prophages were labelled with different strip colours. There were 15  
19 prophages of *E. albertii* with phage cluster types in the Microbe Versus Phage (MVP)  
20 database, the 15 MVP phage cluster types were labelled. (B). Dot plot of similarity of  
21 prophages using the nucleotide dotplot tool GEPARD [37] and the 5 prophage  
22 groups were marked.

# Figure 1

bioRxiv preprint doi: <https://doi.org/10.1101/2021.02.01.429068>; this version posted February 2, 2021. The copyright holder for this preprint (which was not certified by peer review) is the author/funder. All rights reserved. No reuse allowed without permission.

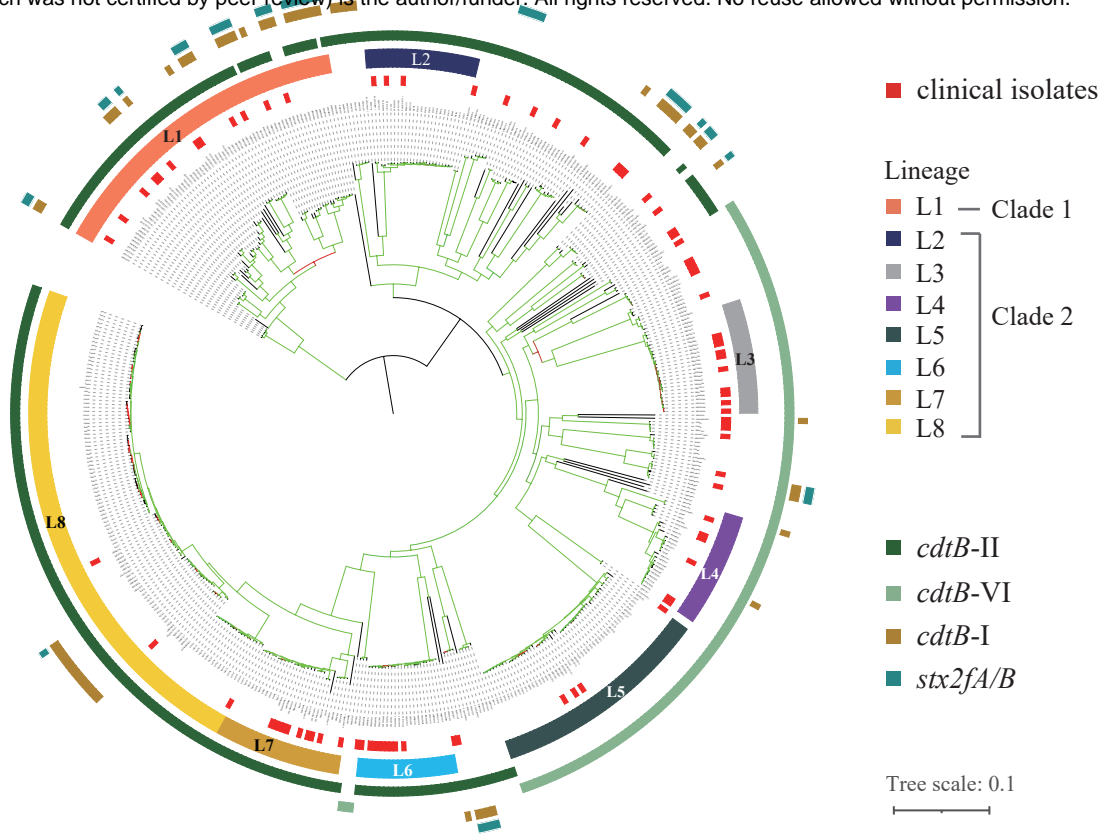

**Figure 2**

**A** bioRxiv preprint doi: <https://doi.org/10.1101/2021.02.01.429068>; this version posted February 2, 2021. The copyright holder for this preprint (which was not certified by peer review) is the author/funder. All rights reserved. No reuse allowed without permission.

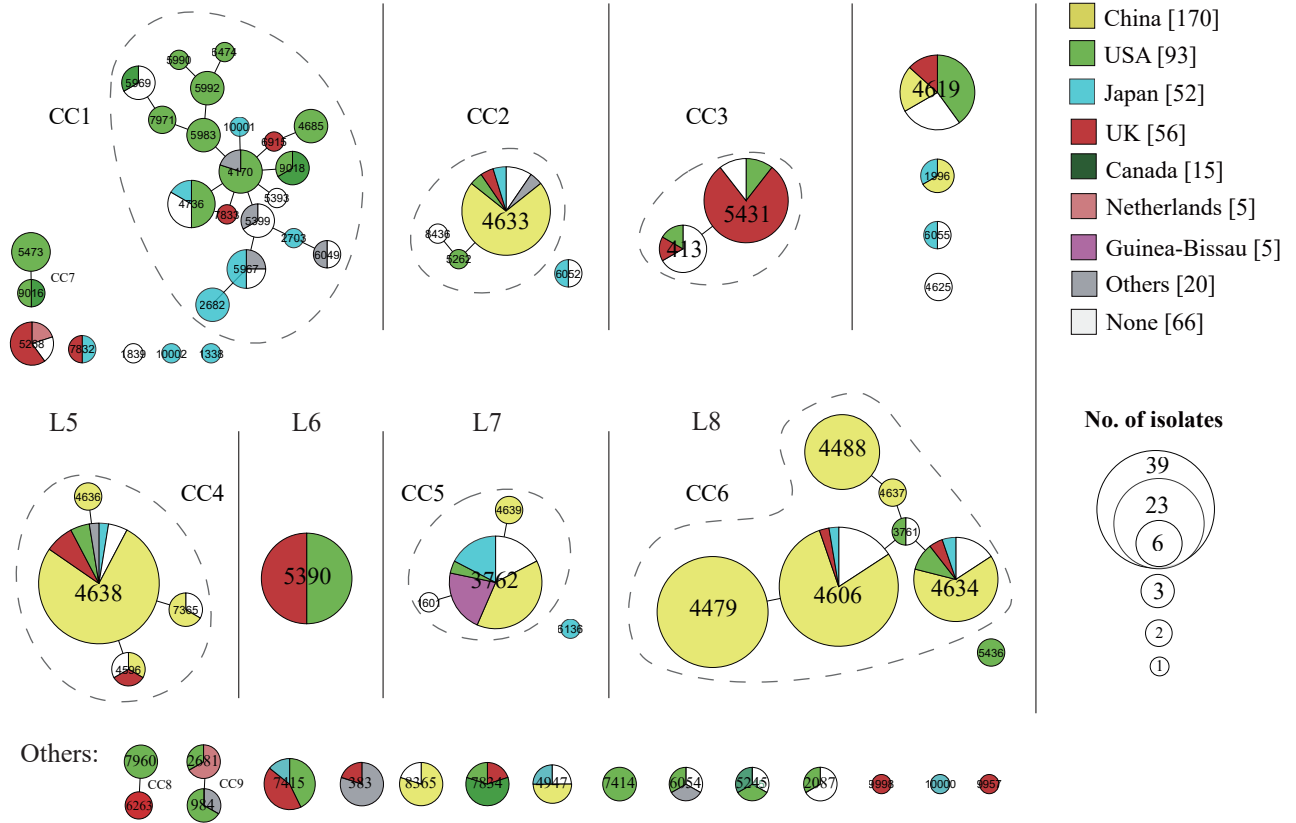

**B**

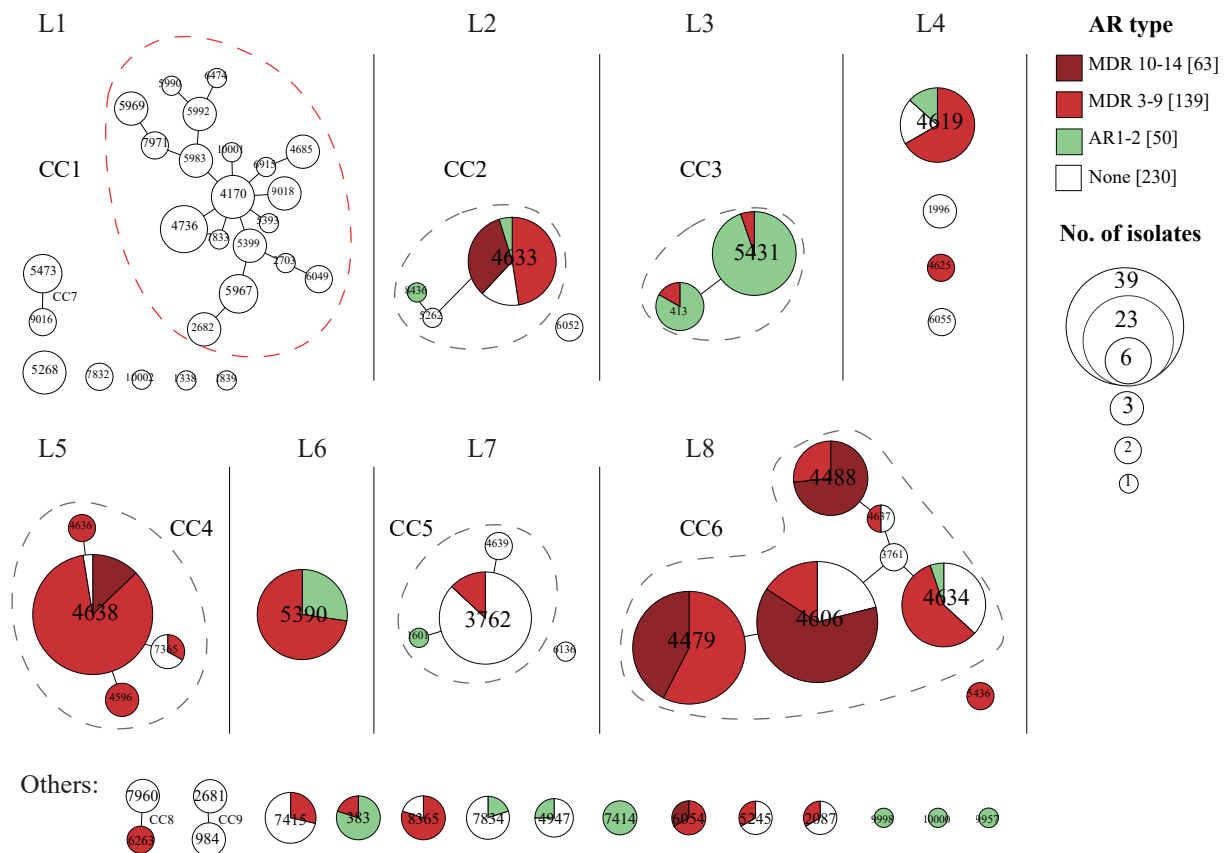

**Figure 3**

bioRxiv preprint doi: <https://doi.org/10.1101/2021.02.01.439068>; this version posted February 2, 2021. The copyright holder for this preprint (which was not certified by peer review) is the author/funder. All rights reserved. No reuse allowed without permission.

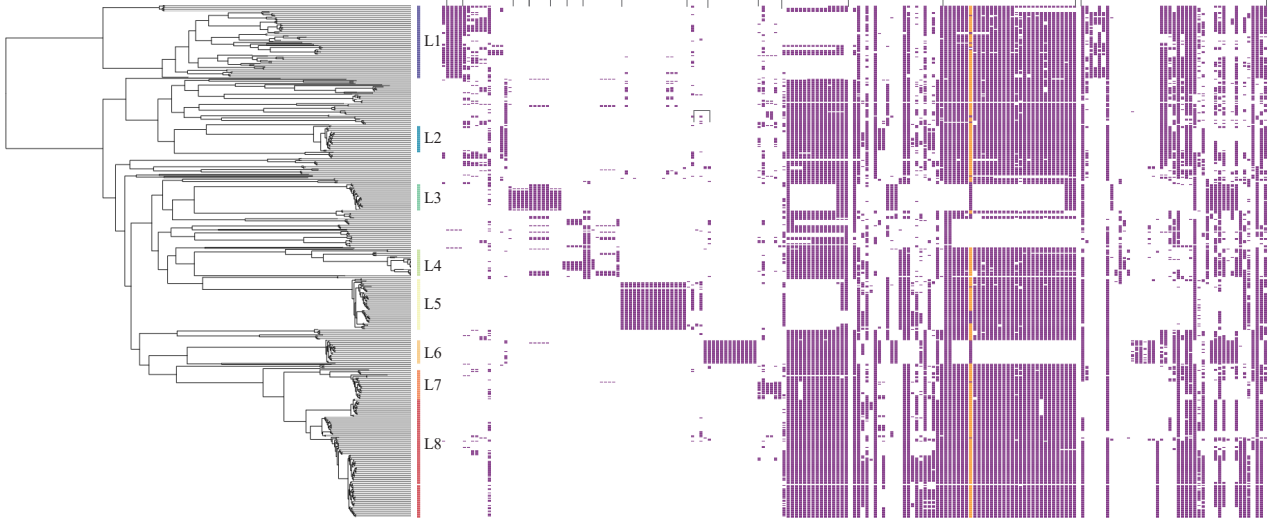

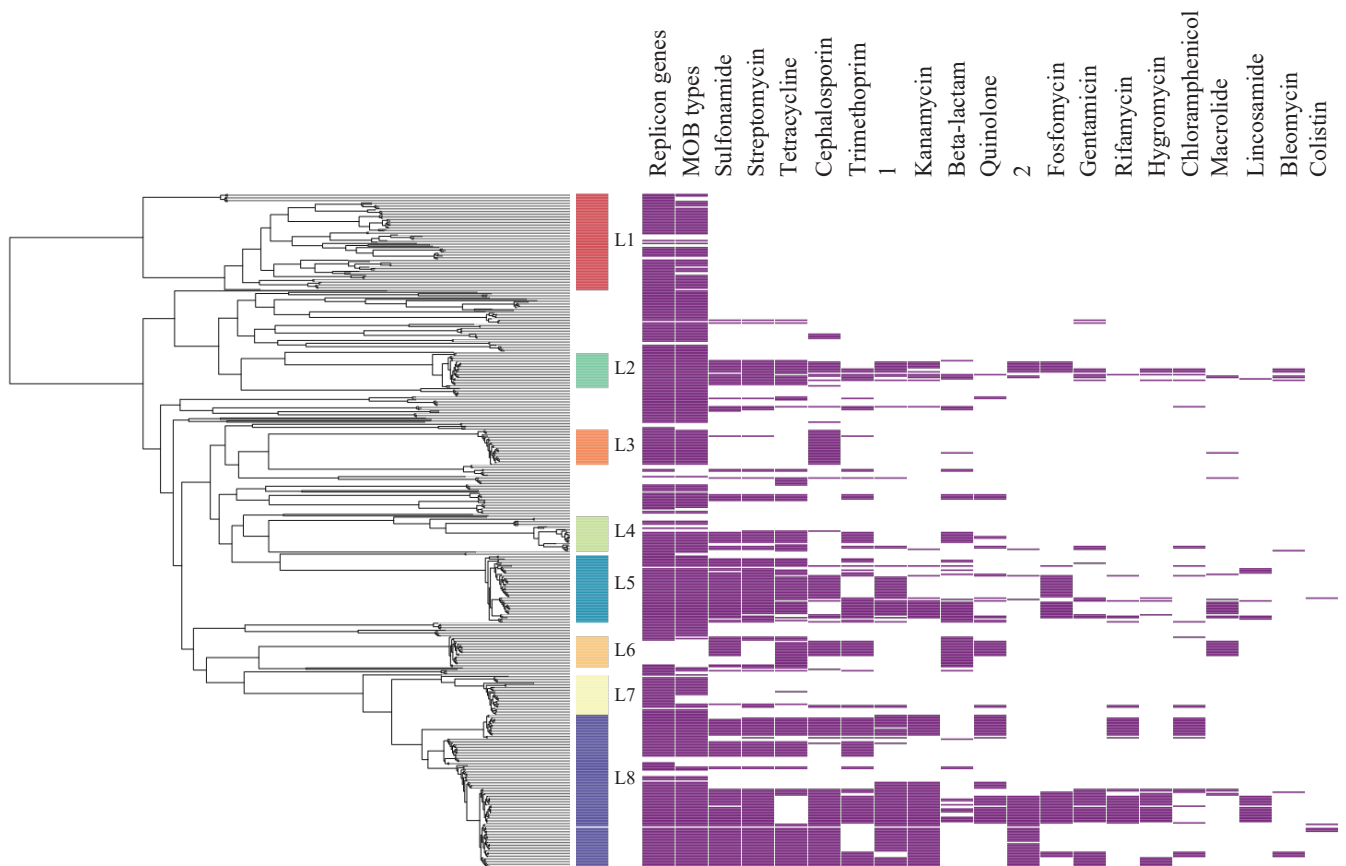

**Figure 5**

bioRxiv preprint doi: <https://doi.org/10.1101/2021.02.01.429068>; this version posted February 2, 2021. The copyright holder for this preprint (which was not certified by peer review) is the author/funder. All rights reserved. No reuse allowed without permission.

**A**

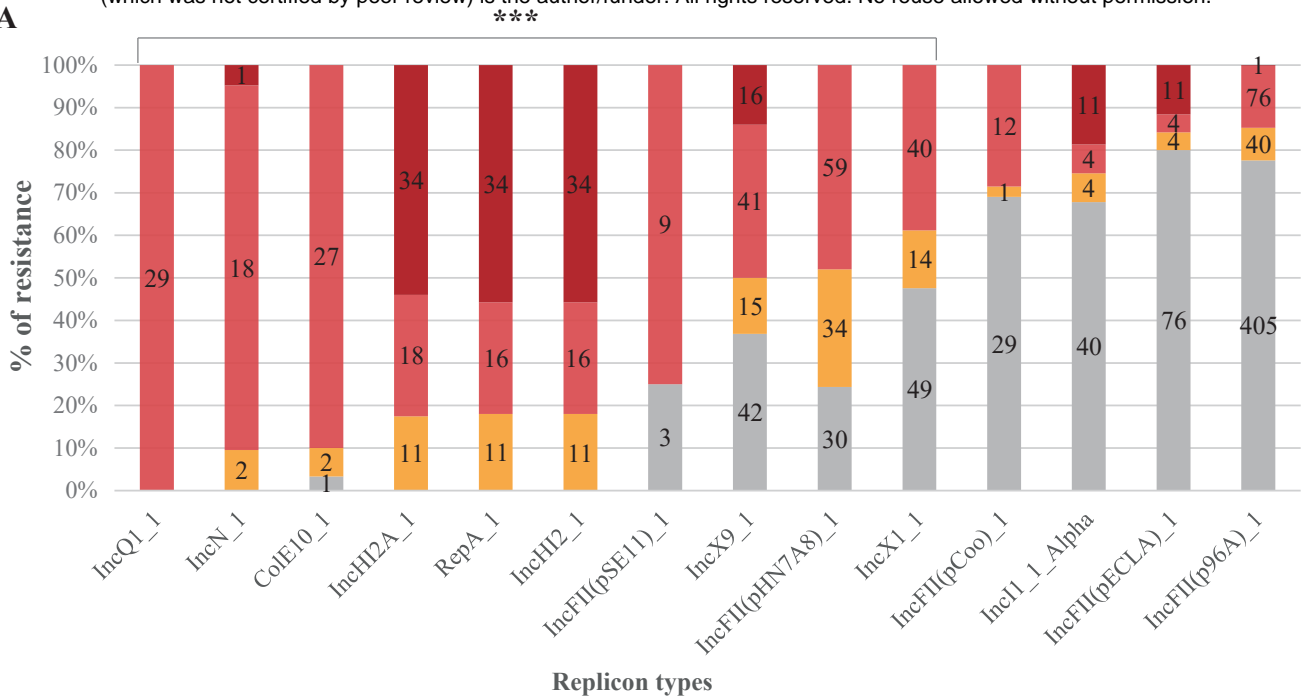

**B**

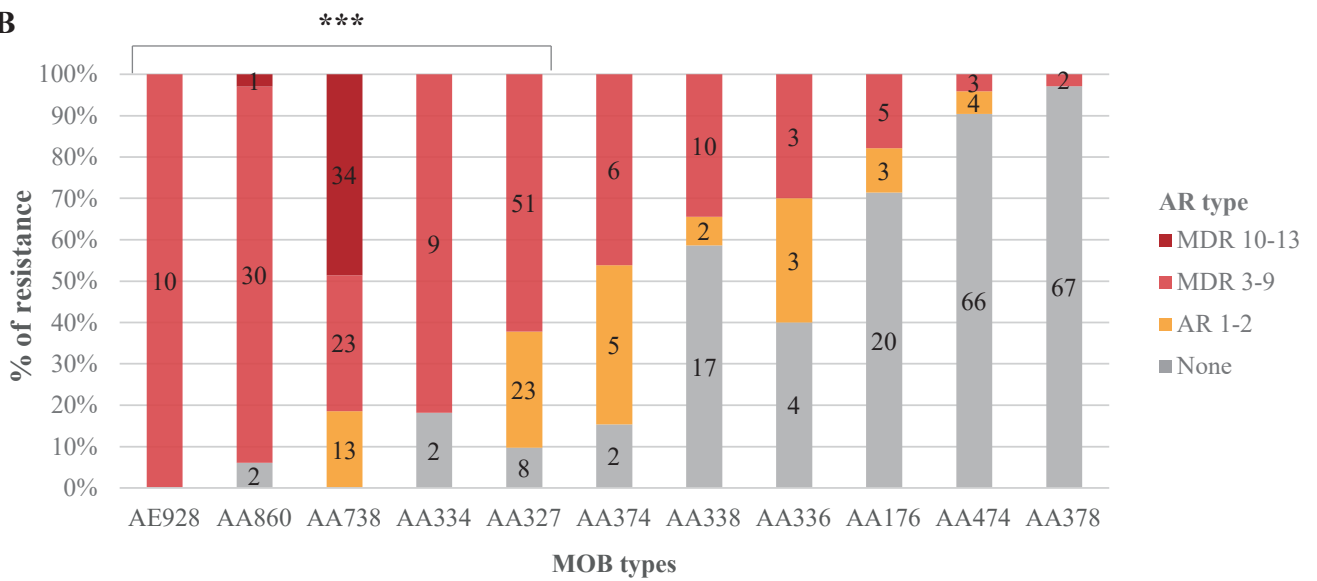



**Figure 6**

bioRxiv preprint doi: <https://doi.org/10.1101/2021.02.01.429068>; this version posted February 2, 2021. The copyright holder for this preprint (which was not certified by peer review) is the author/funder. All rights reserved. No reuse allowed without permission.

**A**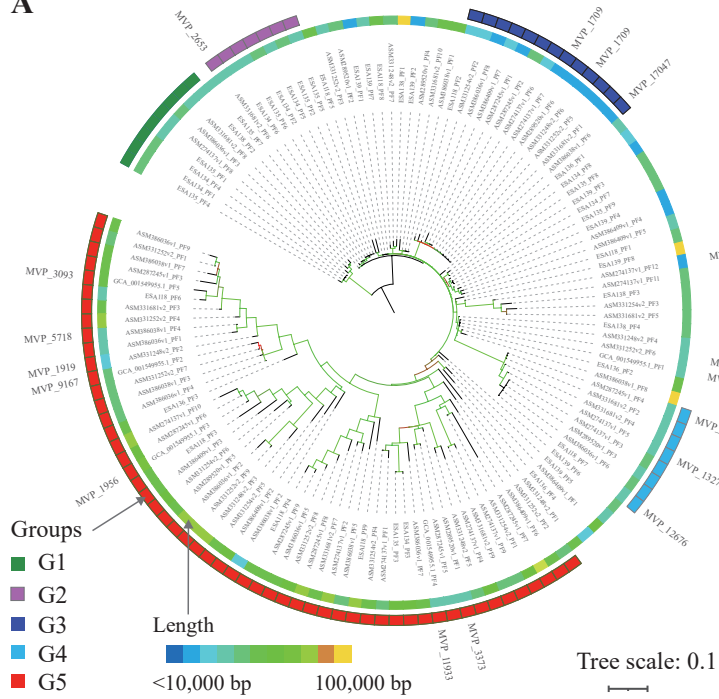**B**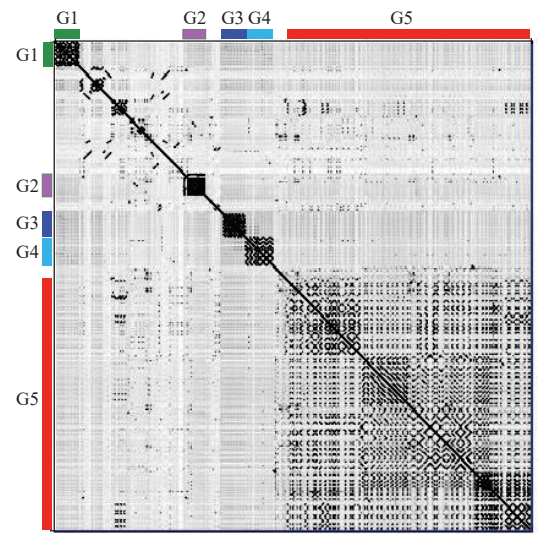

Source: http://biorxiv.org/content/10.1101/2021.02.01.429068v1.full.pdf
